# Supplementary material
Source: HighWire-hosted journal article supplement (http://jmg.bmjjournals.com/highwire/filestream/159927/field_highwire_adjunct_files/0/443e70supp1.pdf)

Patient IV-5

Fundus

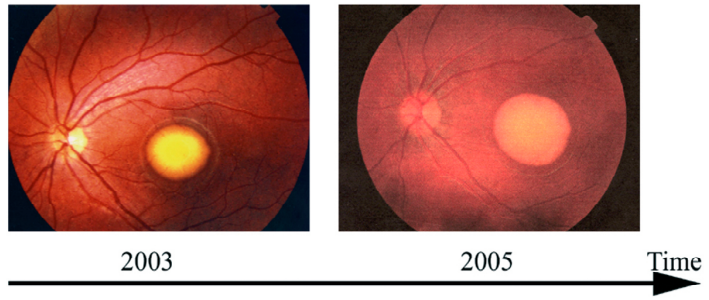

OCT  
(2005)

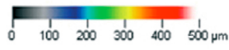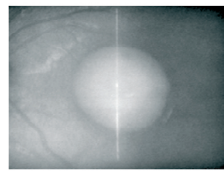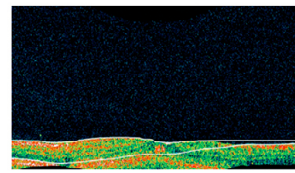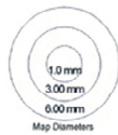

|                          |                      |
|--------------------------|----------------------|
| Signal Strength (Max 10) | 6                    |
| Foveal Thickness         | 183 +/- 39 microns   |
| Total Macular Volume     | 6.65 mm <sup>3</sup> |

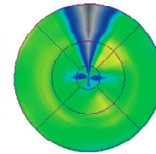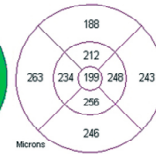

Supplement: 443e70supp1.pdf [file 443e70supp1.pdf]
